# Supplementary material
Source: PubMed Central journal article supplement (PMC535084)
Supplement: 7600467s1.pdf [file 7600467s1.pdf]

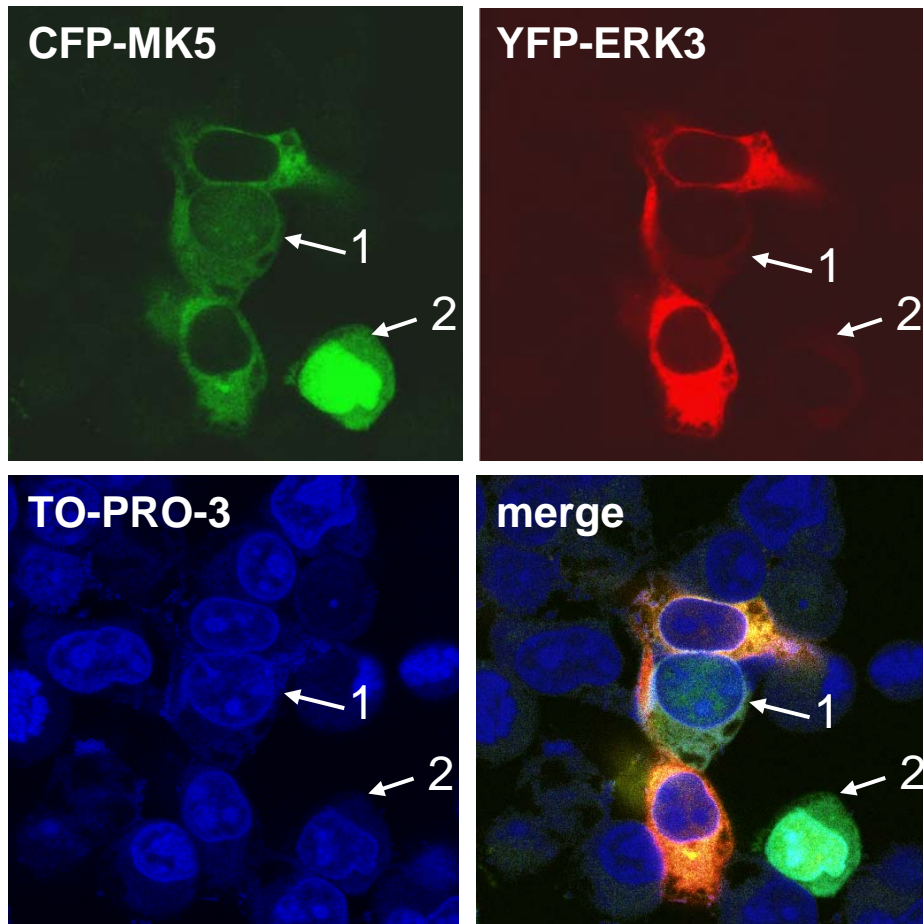

**Supplementary Figure 1:** MK5 translocation depends on ERK3 level. In HEK 293 cells expressing lower levels of ERK3, MK5 translocation is incomplete (arrow 1) or MK5 remains in the nucleus (arrow 2).
