# Supplementary material
Source: PubMed Central journal article supplement (PMC535084)
Supplement: 7600467s2.pdf [file 7600467s2.pdf]

**A**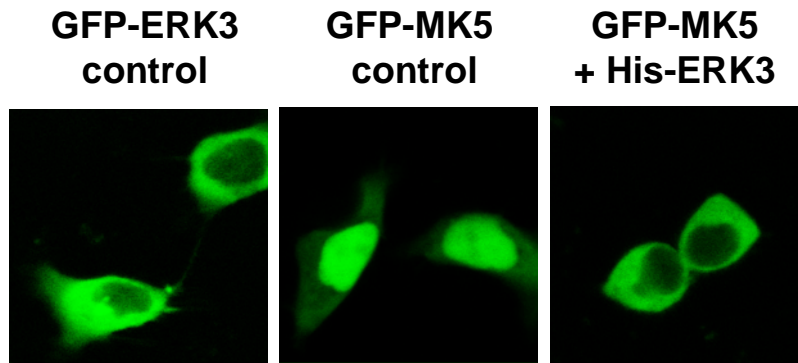**B**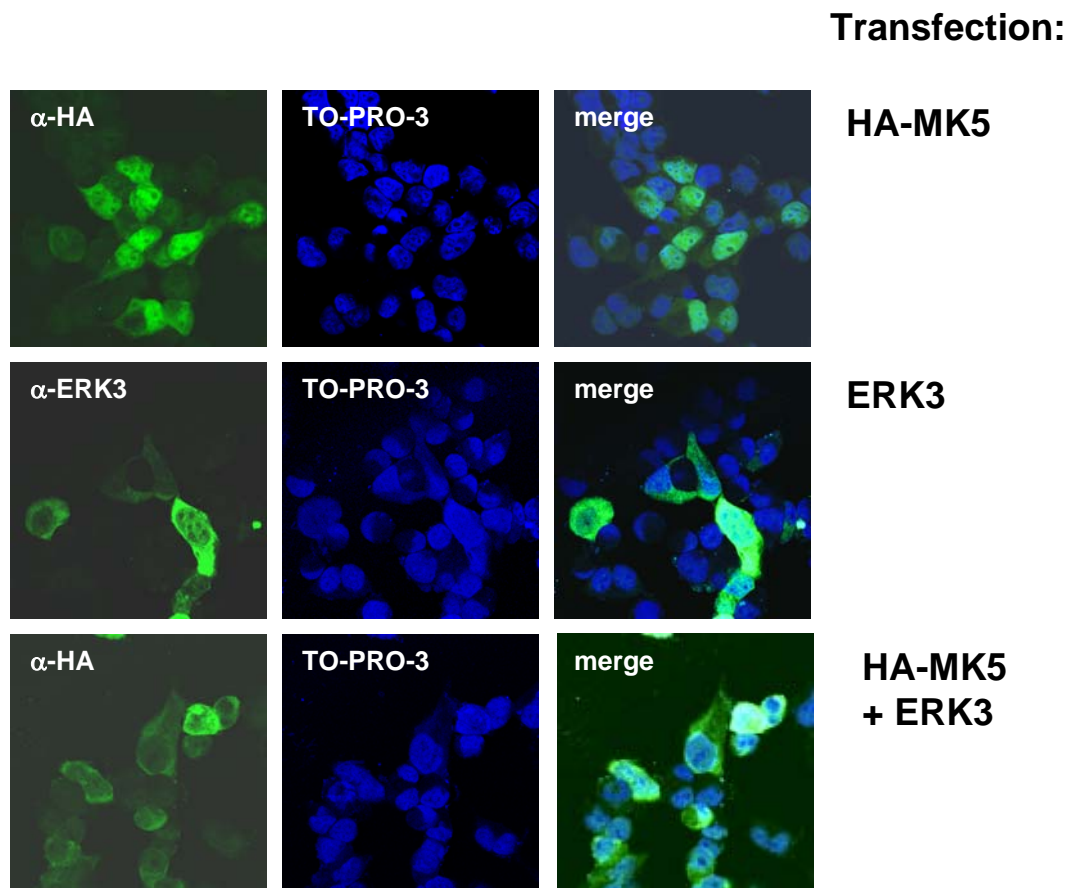

**Supplementary Figure 2:** Cell type (A) and fusion tag (B) – independency of ERK3-mediated translocation of MK5. In addition to the translocation in HEK 293 cells (as shown in Figure 2), GFP-MK5 is also translocated by His-ERK3 in HeLa cells (A). Instead of GFP-tagged MK5, translocation is also obtained for HA-tagged MK5 when ERK3 is ectopically expressed in HEK 293 cells (B).
