# Supplementary material
Source: PubMed Central journal article supplement (PMC535084)
Supplement: 7600467s3.pdf [file 7600467s3.pdf]

**GFP-ERK3  
control**

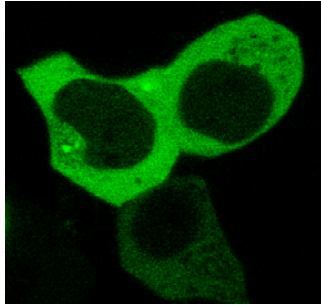

**GFP-MK5  
control**

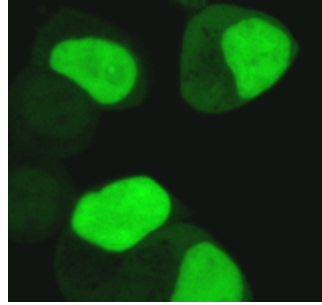

**GFP-ERK3  
+ LMB**

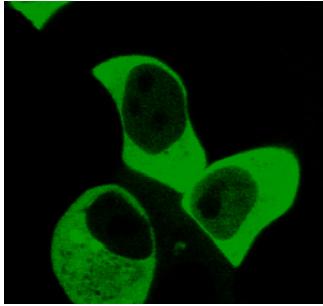

**GFP-MK5  
+ His-ERK3  
+ LMB**

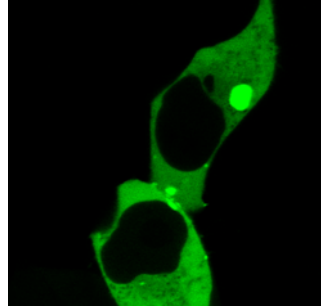

**GFP-MK5  
+ His-ERK3  
+ SB203580**

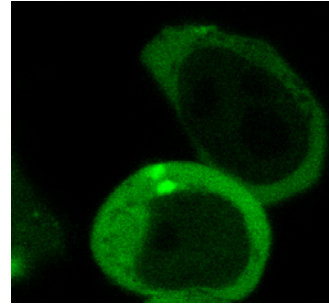

**GFP-MK2  
control**

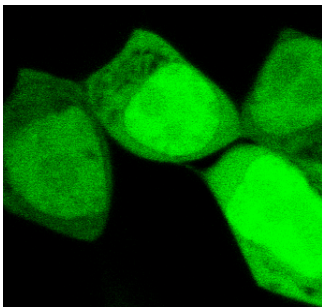

**GFP-MK2  
+ arsenite**

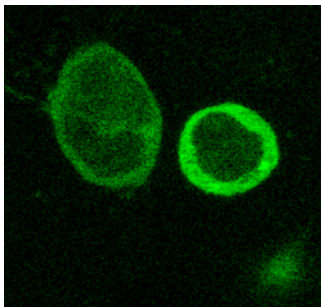

**GFP-MK2  
+ arsenite  
+ LMB**

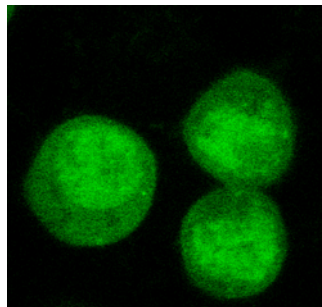

**GFP-MK2  
+ arsenite  
+ SB203580**

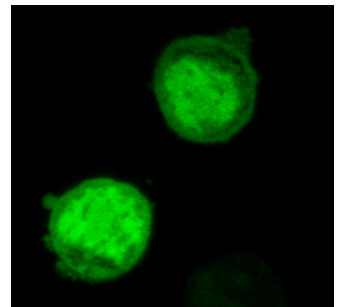

**Supplementary Figure 3:** Leptomycin B (LMB, 200 nM, 1h) and SB 203580 (10  $\mu$ M, 1h) do not block His-ERK3-mediated cytoplasmic translocation of MK5 (middle panel) but inhibit arsenite-stimulated (100  $\mu$ M, 1h) nuclear-cytoplasmic translocation of MK2 (lower panel) in HEK 293 cells. Arsenite treatment is known to lead to some detachment and rounding up of the cells.
